# Supplementary material for: Characterizing the ZrC(111)/c-ZrO2(111) Hetero-Ceramic Interface: First Principles DFT and Atomistic Thermodynamic Modeling
Source: MDPI journal article supplement (doi:10.3390/molecules27092954), 2022-05-05
Supplement: s1 [file s1]

## Characterizing the $\text{ZrC}(111)/c\text{-ZrO}_2(111)$ Hetero-ceramic Interface: First Principles DFT and Atomistic Thermodynamic Modeling

Eric Osei-Agyemang,<sup>1</sup> Jean-François Paul,<sup>2</sup> Romain Lucas,<sup>3\*</sup> Sylvie Foucaud,<sup>3</sup> Sylvain Cristol<sup>2</sup>, Anne-Sophie Mamede<sup>2</sup>, Nicolas Nuns<sup>2</sup>, Ahmed Addad<sup>4</sup>

<sup>1</sup> Department of Materials Design and Innovation, University at Buffalo, Buffalo, New York 14260-1660, USA

<sup>2</sup> Université de Lille 1, Univ. Lille, CNRS, ENSCL, Centrale Lille, Univ. Artois, UMR 8181 - UCCS - Unité de Catalyse et de Chimie du Solide.

<sup>3</sup> Université de Limoges, IRCER, UMR 7315, F-87068 Limoges, France

<sup>4</sup> Unité Matériaux et Transformations, Université Lille 1, CNRS-UMR 8207

### TEM-ED characterization of $\text{ZrC}/\text{ZrO}_2$

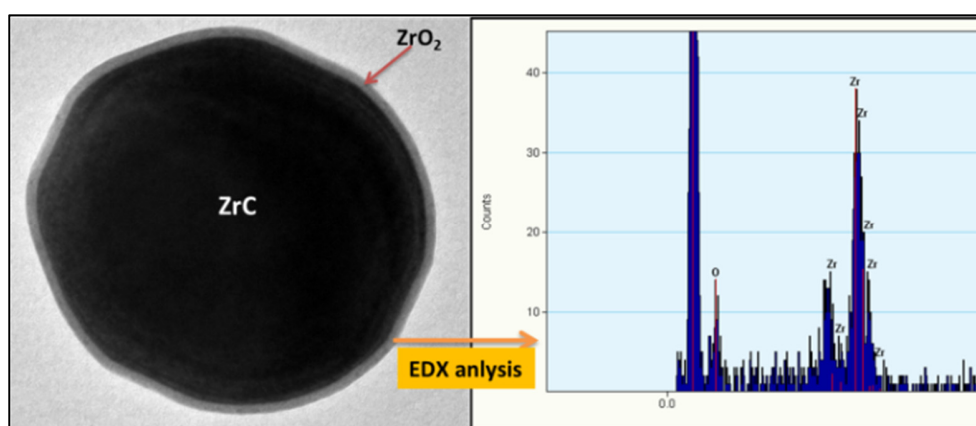

Figure S1. TEM and EDX identification of Zirconium Oxide on ZrC particles.

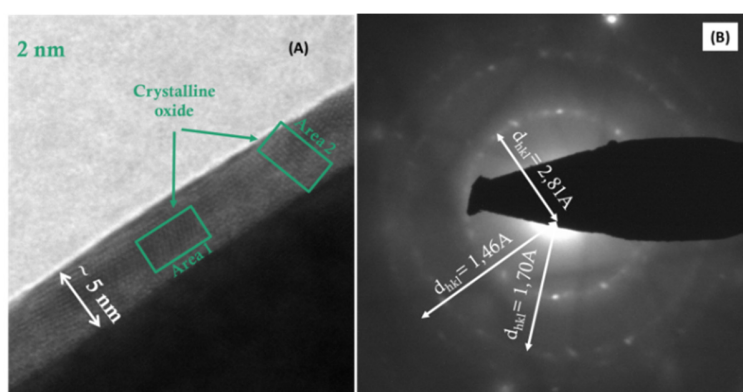

Figure S2. ED pattern and  $d_{hkl}$  indexation of  $\text{ZrO}_2$  layer on ZrC particles.
